# Supplementary material for: Provision and Perception of Physiotherapy in the Nonoperative Management of Degenerative Cervical Myelopathy (DCM): A Cross-Sectional Questionnaire of People Living With DCM
Source: PubMed Central journal article supplement (PMC9109573; doi:10.1177/2192568220961357), 2020-10-01
Supplement: sj-pdf-2-gsj-10.1177_2192568220961357.pdf [file sj-pdf-2-gsj-10.1177_2192568220961357.pdf]

| Variable                                               | Complete data (n=167) |              |     | Incomplete data (n = 514) |              |     | p            | Test           |
|--------------------------------------------------------|-----------------------|--------------|-----|---------------------------|--------------|-----|--------------|----------------|
|                                                        | %                     | Mean (SD)    | n   | %                         | Mean (SD)    | n   |              |                |
| <b>Gender:</b>                                         |                       |              |     |                           |              | 362 | <b>0.63</b>  | X <sup>2</sup> |
| Female                                                 | 72.3                  | -            | 120 | 75.1                      | -            | 272 |              |                |
| Male                                                   | 27.7                  | -            | 46  | 33.1                      | -            | 90  |              |                |
| <b>Age of respondent:</b>                              |                       | 53.9(10.8)   | 164 |                           | 55.4(10.0)   | 193 | <b>0.782</b> | MWW            |
| <b>Country of current residence:</b>                   |                       |              | 167 |                           |              | 293 | <b>0.535</b> | Fisher's       |
| UK                                                     | 51.5                  | -            | 86  | 49.5                      | -            | 145 |              |                |
| USA                                                    | 33.5                  | -            | 56  | 37.2                      | -            | 109 |              |                |
| Canada                                                 | 6.6                   | -            | 11  | 5.5                       | -            | 16  |              |                |
| Australia                                              | 1.8                   | -            | 3   | 3.8                       | -            | 11  |              |                |
| Other                                                  | 6.6                   | -            | 11  | 4.1                       | -            | 12  |              |                |
| <b>Ethnicity:</b>                                      |                       |              | 166 |                           |              | 283 | <b>0.324</b> | Fisher's       |
| White / Caucasian                                      | 88.6                  | -            | 147 | 91.2                      | -            | 258 |              |                |
| Asian                                                  | 5.4                   | -            | 9   | 2.8                       | -            | 8   |              |                |
| Black or African American                              | 1.2                   | -            | 2   | 3.5                       | -            | 10  |              |                |
| Other                                                  | 4.8                   | -            | 8   | 2.5                       | -            | 7   |              |                |
| <b>Employment status:</b>                              |                       |              | 167 |                           |              | 292 | <b>0.688</b> | X <sup>2</sup> |
| Employed, full-time                                    | 31.7                  | -            | 53  | 27.1                      | -            | 79  |              |                |
| Employed, part-time                                    | 16.2                  | -            | 27  | 11.6                      | -            | 34  |              |                |
| Disabled, not able to work                             | 28.1                  | -            | 47  | 30.5                      | -            | 89  |              |                |
| Unemployed, looking for work                           | 3                     | -            | 5   | 3.4                       | -            | 10  |              |                |
| Unemployed, not looking for work                       | 4.2                   | -            | 7   | 7.5                       | -            | 22  |              |                |
| Retired                                                | 16.8                  | -            | 28  | 19.9                      | -            | 58  |              |                |
| <b>Annual income:</b>                                  |                       |              | 165 |                           |              | 286 | <b>0.761</b> | X <sup>2</sup> |
| £0 to £9,999                                           | 8.5                   | -            | 14  | 9.8                       | -            | 28  |              |                |
| £10,000 to £24,999                                     | 14.5                  | -            | 24  | 13.3                      | -            | 38  |              |                |
| £25,000 to £49,999                                     | 24.8                  | -            | 41  | 16.8                      | -            | 48  |              |                |
| £50,000 to £99,999                                     | 14.5                  | -            | 24  | 14.0                      | -            | 40  |              |                |
| £100,000 to £149,999                                   | 3                     | -            | 5   | 6.3                       | -            | 18  |              |                |
| £150,000+                                              | 3                     | -            | 5   | 3.1                       | -            | 9   |              |                |
| Prefer not to answer                                   | 31.5                  | -            | 52  | 36.7                      | -            | 105 |              |                |
| <b>Education level:</b>                                |                       |              | 164 |                           |              | 289 | <b>0.197</b> | X <sup>2</sup> |
| Less than high school degree                           | 11                    | -            | 18  | 9.7                       | -            | 28  |              |                |
| High school degree or equivalent                       | 18.3                  | -            | 30  | 16.3                      | -            | 47  |              |                |
| Some college but no degree                             | 20.1                  | -            | 33  | 30.4                      | -            | 88  |              |                |
| Associate degree                                       | 9.8                   | -            | 16  | 9.7                       | -            | 28  |              |                |
| Bachelor degree                                        | 18.9                  | -            | 31  | 19.0                      | -            | 55  |              |                |
| Graduate degree                                        | 22                    | -            | 36  | 14.9                      | -            | 43  |              |                |
| <b>Dependent on others to support daily activities</b> |                       |              | 167 |                           |              | 410 | <b>0.868</b> | X <sup>2</sup> |
| Yes                                                    | 38.3                  | -            | 64  | 36.8                      | -            | 151 |              |                |
| No                                                     | 61.7                  | -            | 103 | 63.2                      | -            | 259 |              |                |
| <b>Time to diagnosis</b>                               |                       |              | 164 |                           |              | 446 | <b>0.042</b> | X <sup>2</sup> |
| 0-6 months                                             | 27.4                  | -            | 45  | 29.6                      | -            | 132 |              |                |
| 7-12 month                                             | 14.6                  | -            | 24  | 13.5                      | -            | 60  |              |                |
| 1-2 years                                              | 20.7                  | -            | 34  | 17.5                      | -            | 78  |              |                |
| 2-5 years                                              | 25.0                  | -            | 41  | 14.1                      | -            | 63  |              |                |
| >5 years                                               | 12.2                  | -            | 20  | 25.3                      | -            | 113 |              |                |
| <b>Duration of symptoms</b>                            |                       |              | 165 |                           |              | 446 | <b>0.311</b> | X <sup>2</sup> |
| 0-1 year                                               | 20.0                  | -            | 33  | 21.3                      | -            | 95  |              |                |
| 1-3 years                                              | 32.1                  | -            | 53  | 26.9                      | -            | 120 |              |                |
| 3-10 years                                             | 32.7                  | -            | 54  | 29.4                      | -            | 131 |              |                |
| 10-25 years                                            | 13.9                  | -            | 23  | 17.7                      | -            | 79  |              |                |
| >25 years                                              | 1.2                   | -            | 2   | 4.7                       | -            | 21  |              |                |
| <b>Nurick score, mean (SD)</b>                         |                       | 1.95 (1.40)  | 167 |                           | 1.81(1.52)   |     | <b>0.889</b> | X <sup>2</sup> |
| <b>mJOA score, mean (SD)</b>                           |                       | 12.34 (3.05) | 167 |                           | 12.72 (2.99) |     |              |                |
| <b>mJOA score, classed</b>                             |                       |              | 167 |                           |              | 255 | <b>0.71</b>  | X <sup>2</sup> |
| Severe (0-11)                                          | 36.5                  |              | 61  | 36.9                      |              | 94  |              |                |
| Moderate (12-14)                                       | 38.3                  |              | 64  | 32.2                      |              | 82  |              |                |
| Mild (>14)                                             | 25.1                  |              | 42  | 31.0                      |              | 79  |              |                |
| <b>Neck pain score: current, mean (SD)</b>             |                       | 5.11 (2.50)  | 167 |                           | 5.42 (2.69)  | 350 | <b>0.348</b> | X <sup>2</sup> |
| <b>Neck pain score: best, mean (SD)</b>                |                       | 3.74 (2.14)  | 167 |                           | 4.01 (2.32)  | 350 | <b>0.974</b> | Fisher's       |
| <b>Neck pain score: worst, mean (SD)</b>               |                       | 7.19 (2.58)  | 167 |                           | 7.13 (2.79)  | 350 | <b>0.321</b> | Fisher's       |
