# Supplementary material for: Provision and Perception of Physiotherapy in the Nonoperative Management of Degenerative Cervical Myelopathy (DCM): A Cross-Sectional Questionnaire of People Living With DCM
Source: PubMed Central journal article supplement (PMC9109573; doi:10.1177/2192568220961357), 2020-10-01
Supplement: sj-pdf-3-gsj-10.1177_2192568220961357.pdf [file sj-pdf-3-gsj-10.1177_2192568220961357.pdf]

### **Response Data Calculations**

All definitions are copied from the Checklist for Reporting Results of Internet E-Surveys (CHERRIES).

| <b>Rate</b>               | <b>Definition</b>                                                        | <b>Variables</b>                                                                                                                                                                                                                                                                                                                                                                                                                                                                              | <b>Calculation</b>          |
|---------------------------|--------------------------------------------------------------------------|-----------------------------------------------------------------------------------------------------------------------------------------------------------------------------------------------------------------------------------------------------------------------------------------------------------------------------------------------------------------------------------------------------------------------------------------------------------------------------------------------|-----------------------------|
| <b>View rate</b>          | Unique survey visitors<br>÷<br>Unique site visitors                      | <b>Unique site visitors</b> <ul style="list-style-type: none"> <li>Myelopathy UK unique site visitors in October 2015 to August 2017 = <b>26,501</b></li> </ul>                                                                                                                                                                                                                                                                                                                               | <b>6.3%</b><br>(1663/26501) |
|                           |                                                                          | <b>Unique survey visitors</b> <ul style="list-style-type: none"> <li>SurveyMonkey completion rate = 67% (individuals that visited the survey ÷ individuals that submitted a response).</li> <li>1114 people submitted a response from October 2015 to August 2017</li> <li>Therefore <b>1663</b> people visited the survey in that time</li> </ul>                                                                                                                                            |                             |
| <b>Participation rate</b> | Unique visitors who agreed to participate<br>÷<br>Unique survey visitors | <b>Users who agreed to participate</b> <ul style="list-style-type: none"> <li>Submission of the survey, regardless of quantity of data entered, to presumed to indicate agreement to participate</li> <li><b>1114</b> people submitted a response from October 2015 to August 2017</li> </ul>                                                                                                                                                                                                 | <b>67.0%</b><br>(1114/1663) |
|                           |                                                                          | <b>Users who completed the survey</b> <ul style="list-style-type: none"> <li>Extracted data was divided into: <ul style="list-style-type: none"> <li>Completely incomplete (n = 283)</li> <li>No DCM (n = 53)</li> <li>Completely complete (n = 778)</li> </ul> </li> <li>All respondents that did not have DCM did not answer any questions beyond their disease status, therefore were judged to be incomplete answers</li> <li>Therefore <b>778</b> people completed the survey</li> </ul> |                             |
| <b>Completion rate</b>    | Ratio of users who finished the survey/users who agreed to participate   |                                                                                                                                                                                                                                                                                                                                                                                                                                                                                               | <b>69.8%</b><br>(778/1114)  |
